# Supplementary material for: Expanding the Scope of Adenoviral Vectors by Utilizing Novel Tools for Recombination and Vector Rescue
Source: MDPI journal article supplement (doi:10.3390/v16050658), 2024-04-23
Supplement: s1 [file s1]

Supplementary Materials

# Expanding the Scope of Adenoviral Vectors by Utilizing Novel Tools for Recombination and Vector Rescue

**Table S1.** Plasmid List. List of plasmids used and generated for this study, including general features, size and GenBank Accession Number.

| Plasmid Name | Size     | Features                                                                                                                                                                 | Accession |
|--------------|----------|--------------------------------------------------------------------------------------------------------------------------------------------------------------------------|-----------|
| pGPS1.1      | 4814 bp  | GPS-1 Genome Priming System transposon donor; kanamycin resistance (KanR); tetracycline resistance (TetR)                                                                | 10666445  |
| pKD46        | 6329 bp  | red-recombineering plasmid; Arabia sugar dependent expression of lambda red phage exo, beta and gam protein; temperature sensitive; $\beta$ -lactamase expression (AmpR) | 10829079  |
| pKSB2        | 6457 bp  | Single-copy BACmid backbone; chloramphenicol resistance (CamR)                                                                                                           |           |
| pBWH-A12-RC  | 40563 bp | Genomic BACmid; carrying HAdV-A12 genome in reverse orientation; ITRs flanked by ACT sequences; chloramphenicol resistance (CamR)                                        | PP442630  |
| pBWH-B3      | 41781 bp | Genomic BACmid; carrying HAdV-B3 genome; ITRs flanked by ACT sequences; chloramphenicol resistance (CamR)                                                                | PP442581  |
| pBWH-B35-RC  | 41232 bp | Genomic BACmid; carrying HAdV-B35 genome in reverse orientation; ITRs flanked by ACT sequences; chloramphenicol resistance (CamR)                                        | PP442594  |
| pBWH-C2-RC   | 42375 bp | Genomic BACmid; carrying HAdV-C2 genome in reverse orientation; ITRs flanked by ACT sequences; chloramphenicol resistance (CamR)                                         | PP442595  |
| pBWH-F41-RC  | 40626 bp | Genomic BACmid; carrying HAdV-F41 genome in reverse orientation; ITRs flanked by ACT sequences; chloramphenicol resistance (CamR)                                        | PP442608  |
| pBWH-SE25    | 42957 bp | Genomic BACmid; carrying SAdV-E25 genome; ITRs flanked by ACT sequences; chloramphenicol resistance (CamR)                                                               | PP442609  |
| pUC-B3-Ins0  | 2232 bp  | HAdV-B3-targeted transfer vector, designated Insertion site 0; empty multi cloning site; $\beta$ -lactamase expression (AmpR)                                            | PP442615  |
| pUC-B3-Ins1  | 2625 bp  | HAdV-B3-targeted transfer vector, designated Insertion site 1; empty multi cloning site; $\beta$ -lactamase expression (AmpR)                                            | PP442616  |
| pUC-B3-Ins2  | 3055 bp  | HAdV-B3-targeted transfer vector, designated Insertion site 2; empty multi cloning site; $\beta$ -lactamase expression (AmpR)                                            | PP442617  |
| pUC-B3-Ins3  | 2255 bp  | HAdV-B3-targeted transfer vector, designated Insertion site 3; empty multi cloning site; $\beta$ -lactamase expression (AmpR)                                            | PP442618  |
| pUC-B3-Ins4  | 2414 bp  | HAdV-B3-targeted transfer vector, designated Insertion site 4; empty multi cloning site; $\beta$ -lactamase expression (AmpR)                                            | PP442619  |
| pUC-E4-Ins0  | 2231 bp  | HAdV-E4-targeted transfer vector, designated Insertion site 0; empty multi cloning site; $\beta$ -lactamase expression (AmpR)                                            | PP442625  |
| pUC-E4-Ins1  | 2821 bp  | HAdV-E4-targeted transfer vector, designated Insertion site 1; empty multi cloning site; $\beta$ -lactamase expression (AmpR)                                            | PP442626  |
| pUC-E4-Ins2  | 2386 bp  | HAdV-E4-targeted transfer vector, designated Insertion site 2; empty multi cloning site; $\beta$ -lactamase expression (AmpR)                                            | PP442627  |
| pUC-E4-Ins3  | 2779 bp  | HAdV-E4-targeted transfer vector, designated Insertion site 3; empty multi cloning site; $\beta$ -lactamase expression (AmpR)                                            | PP442628  |
| pUC-E4-Ins4  | 2134 bp  | HAdV-E4-targeted transfer vector, designated Insertion site 4; empty multi cloning site; $\beta$ -lactamase expression (AmpR)                                            | PP442629  |

|                                         |          |                                                                                                                                                                                                                                                            |          |
|-----------------------------------------|----------|------------------------------------------------------------------------------------------------------------------------------------------------------------------------------------------------------------------------------------------------------------|----------|
| <b>pUC-B3-I0-mCMV-GFPt2aGLuc</b>        | 5014 bp  | HAdV-B3-targeted transfer vector, designated Insertion site 0; constitutive expression of T2A-peptide-linked GFP and gaussia luciferase; $\beta$ -lactamase expression (AmpR)                                                                              | PP442610 |
| <b>pUC-B3-I1-mCMV-GFPt2aGLuc</b>        | 5407 bp  | HAdV-B3-targeted transfer vector, designated Insertion site 1; constitutive expression of T2A-peptide-linked GFP and gaussia luciferase; $\beta$ -lactamase expression (AmpR)                                                                              | PP442611 |
| <b>pUC-B3-I2-mCMV-GFPt2aGLuc</b>        | 5837 bp  | HAdV-B3-targeted transfer vector, designated Insertion site 2; constitutive expression of T2A-peptide-linked GFP and gaussia luciferase; $\beta$ -lactamase expression (AmpR)                                                                              | PP442612 |
| <b>pUC-B3-I3-mCMV-GFPt2aGLuc</b>        | 5037 bp  | HAdV-B3-targeted transfer vector, designated Insertion site 3; constitutive expression of T2A-peptide-linked GFP and gaussia luciferase; $\beta$ -lactamase expression (AmpR)                                                                              | PP442613 |
| <b>pUC-B3-I4-mCMV-GFPt2aGLuc</b>        | 5196 bp  | HAdV-B3-targeted transfer vector, designated Insertion site 4; constitutive expression of T2A-peptide-linked GFP and gaussia luciferase; $\beta$ -lactamase expression (AmpR)                                                                              | PP442614 |
| <b>pUC-E4-I0-mCMV-GFPt2aGLuc</b>        | 5013 bp  | HAdV-E4-targeted transfer vector, designated Insertion site 0; constitutive expression of T2A-peptide-linked GFP and gaussia luciferase; $\beta$ -lactamase expression (AmpR)                                                                              | PP442620 |
| <b>pUC-E4-I1-mCMV-GFPt2aGLuc</b>        | 5603 bp  | HAdV-E4-targeted transfer vector, designated Insertion site 1; constitutive expression of T2A-peptide-linked GFP and gaussia luciferase; $\beta$ -lactamase expression (AmpR)                                                                              | PP442621 |
| <b>pUC-E4-I2-mCMV-GFPt2aGLuc</b>        | 5168 bp  | HAdV-E4-targeted transfer vector, designated Insertion site 2; constitutive expression of T2A-peptide-linked GFP and gaussia luciferase; $\beta$ -lactamase expression (AmpR)                                                                              | PP442622 |
| <b>pUC-E4-I3-mCMV-GFPt2aGLuc</b>        | 5561 bp  | HAdV-E4-targeted transfer vector, designated Insertion site 3; constitutive expression of T2A-peptide-linked GFP and gaussia luciferase; $\beta$ -lactamase expression (AmpR)                                                                              | PP442623 |
| <b>pUC-E4-I4-mCMV-GFPt2aGLuc</b>        | 4916 bp  | HAdV-E4-targeted transfer vector, designated Insertion site 4; constitutive expression of T2A-peptide-linked GFP and gaussia luciferase; $\beta$ -lactamase expression (AmpR)                                                                              | PP442624 |
| <b>pBWH-B3delE3-I0n-Kan</b>             | 39090 bp | Genomic BACmid; carrying HAdV-B3 genome, E3-region deleted; Insertion Site 0n primed for HFR via insertion of KanR; ITRs flanked by ACT sequences; chloramphenicol resistance (CamR); kanamycin resistance (KanR)                                          | PP442583 |
| <b>pBWH-B3delE3-I0n-mCMV-GFPt2aGLuc</b> | 40882 bp | Genomic BACmid; carrying HAdV-B3 genome, E3-region deleted; constitutive expression of T2A-peptide-linked GFP and gaussia luciferase from Insertion site 0n; ITRs flanked by ACT sequences; chloramphenicol resistance (CamR); kanamycin resistance (KanR) | PP442584 |
| <b>pBWH-B3delE3-Ins0-Kan</b>            | 39535 bp | Genomic BACmid; carrying HAdV-B3 genome, E3-region deleted; Insertion Site 0 primed for HFR via insertion of KanR; ITRs flanked by ACT sequences; chloramphenicol resistance (CamR); kanamycin resistance (KanR)                                           | PP442589 |
| <b>pBWH-B3delE3-I0-mCMV-GFPt2aGLuc</b>  | 40925 bp | Genomic BACmid; carrying HAdV-B3 genome, E3-region deleted; constitutive expression of T2A-peptide-linked GFP and gaussia luciferase from Insertion site 0; ITRs flanked by ACT sequences; chloramphenicol resistance (CamR); kanamycin resistance (KanR)  | PP442582 |
| <b>pBWH-B3delE3-Ins1-Kan</b>            | 39142 bp | Genomic BACmid; carrying HAdV-B3 genome, E3-region deleted; Insertion Site 1 primed for HFR via insertion of KanR; ITRs flanked by ACT sequences; chloramphenicol resistance (CamR); kanamycin resistance (KanR)                                           | PP442590 |
| <b>pBWH-B3delE3-I1-</b>                 | 40925 bp | Genomic BACmid; carrying HAdV-B3 genome, E3-region deleted; constitutive expression of T2A-peptide-linked GFP and gaussia luciferase from                                                                                                                  | PP442585 |

|                                         |          |                                                                                                                                                                                                                                                            |          |
|-----------------------------------------|----------|------------------------------------------------------------------------------------------------------------------------------------------------------------------------------------------------------------------------------------------------------------|----------|
| <b>mCMV-GFPt2aGLuc</b>                  |          | Insertion site 1; ITRs flanked by ACT sequences; chloramphenicol resistance (CamR); kanamycin resistance (KanR)                                                                                                                                            |          |
| <b>pBWH-B3delE3-Ins2-Kan</b>            | 38712 bp | Genomic BACmid; carrying HAdV-B3 genome, E3-region deleted; Insertion Site 2 primed for HFR via insertion of KanR; ITRs flanked by ACT sequences; chloramphenicol resistance (CamR); kanamycin resistance (KanR)                                           | PP442591 |
| <b>pBWH-B3delE3-I2-mCMV-GFPt2aGLuc</b>  | 40925 bp | Genomic BACmid; carrying HAdV-B3 genome, E3-region deleted; constitutive expression of T2A-peptide-linked GFP and gaussia luciferase from Insertion site 2; ITRs flanked by ACT sequences; chloramphenicol resistance (CamR); kanamycin resistance (KanR)  | PP442586 |
| <b>pBWH-B3delE3-Ins3-Kan</b>            | 39512 bp | Genomic BACmid; carrying HAdV-B3 genome, E3-region deleted; Insertion Site 3 primed for HFR via insertion of KanR; ITRs flanked by ACT sequences; chloramphenicol resistance (CamR); kanamycin resistance (KanR)                                           | PP442592 |
| <b>pBWH-B3delE3-I3-mCMV-GFPt2aGLuc</b>  | 40925 bp | Genomic BACmid; carrying HAdV-B3 genome, E3-region deleted; constitutive expression of T2A-peptide-linked GFP and gaussia luciferase from Insertion site 3; ITRs flanked by ACT sequences; chloramphenicol resistance (CamR); kanamycin resistance (KanR)  | PP442587 |
| <b>pBWH-B3delE3-Ins4-Kan</b>            | 39353 bp | Genomic BACmid; carrying HAdV-B3 genome, E3-region deleted; Insertion Site 4 primed for HFR via insertion of KanR; ITRs flanked by ACT sequences; chloramphenicol resistance (CamR); kanamycin resistance (KanR)                                           | PP442593 |
| <b>pBWH-B3delE3-I4-mCMV-GFPt2aGLuc</b>  | 40925 bp | Genomic BACmid; carrying HAdV-B3 genome, E3-region deleted; constitutive expression of T2A-peptide-linked GFP and gaussia luciferase from Insertion site 4; ITRs flanked by ACT sequences; chloramphenicol resistance (CamR); kanamycin resistance (KanR)  | PP442588 |
| <b>pBWH-E4delE3-I0n-Kan</b>             | 39073 bp | Genomic BACmid; carrying HAdV-E4 genome, E3-region deleted; Insertion Site 0n primed for HFR via insertion of KanR; ITRs flanked by ACT sequences; chloramphenicol resistance (CamR); kanamycin resistance (KanR)                                          | PP442597 |
| <b>pBWH-E4delE3-I0n-mCMV-GFPt2aGLuc</b> | 40895 bp | Genomic BACmid; carrying HAdV-E4 genome, E3-region deleted; constitutive expression of T2A-peptide-linked GFP and gaussia luciferase from Insertion site 0n; ITRs flanked by ACT sequences; chloramphenicol resistance (CamR); kanamycin resistance (KanR) | PP442598 |
| <b>pBWH-E4delE3-Ins0-Kan</b>            | 39549 bp | Genomic BACmid; carrying HAdV-E4 genome, E3-region deleted; Insertion Site 0 primed for HFR via insertion of KanR; ITRs flanked by ACT sequences; chloramphenicol resistance (CamR); kanamycin resistance (KanR)                                           | PP442603 |
| <b>pBWH-E4delE3-I0-mCMV-GFPt2aGLuc</b>  | 40938 bp | Genomic BACmid; carrying HAdV-E4 genome, E3-region deleted; constitutive expression of T2A-peptide-linked GFP and gaussia luciferase from Insertion site 0; ITRs flanked by ACT sequences; chloramphenicol resistance (CamR); kanamycin resistance (KanR)  | PP442596 |
| <b>pBWH-E4delE3-Ins1-Kan</b>            | 38959 bp | Genomic BACmid; carrying HAdV-E4 genome, E3-region deleted; Insertion Site 1 primed for HFR via insertion of KanR; ITRs flanked by ACT sequences; chloramphenicol resistance (CamR); kanamycin resistance (KanR)                                           | PP442604 |
| <b>pBWH-E4delE3-I1-mCMV-GFPt2aGLuc</b>  | 40938 bp | Genomic BACmid; carrying HAdV-E4 genome, E3-region deleted; constitutive expression of T2A-peptide-linked GFP and gaussia luciferase from Insertion site 1; ITRs flanked by ACT sequences; chloramphenicol resistance (CamR); kanamycin resistance (KanR)  | PP442599 |
| <b>pBWH-E4delE3-Ins2-Kan</b>            | 39390 bp | Genomic BACmid; carrying HAdV-E4 genome, E3-region deleted; Insertion Site 2 primed for HFR via insertion of KanR; ITRs flanked by ACT sequences; chloramphenicol resistance (CamR); kanamycin resistance (KanR)                                           | PP442605 |
| <b>pBWH-E4delE3-I2-</b>                 | 40938 bp | Genomic BACmid; carrying HAdV-E4 genome, E3-region deleted; constitutive expression of T2A-peptide-linked GFP and gaussia luciferase from                                                                                                                  | PP442600 |

|                                        |          |                                                                                                                                                                                                                                                           |          |
|----------------------------------------|----------|-----------------------------------------------------------------------------------------------------------------------------------------------------------------------------------------------------------------------------------------------------------|----------|
| <b>mCMV-GFPt2aGLuc</b>                 |          | Insertion site 2; ITRs flanked by ACT sequences; chloramphenicol resistance (CamR); kanamycin resistance (KanR)                                                                                                                                           |          |
| <b>pBWH-E4delE3-Ins3-Kan</b>           | 39001 bp | Genomic BACmid; carrying HAdV-E4 genome, E3-region deleted; Insertion Site 3 primed for HFR via insertion of KanR; ITRs flanked by ACT sequences; chloramphenicol resistance (CamR); kanamycin resistance (KanR)                                          | PP442606 |
| <b>pBWH-E4delE3-I3-mCMV-GFPt2aGLuc</b> | 40938 bp | Genomic BACmid; carrying HAdV-E4 genome, E3-region deleted; constitutive expression of T2A-peptide-linked GFP and gaussia luciferase from Insertion site 3; ITRs flanked by ACT sequences; chloramphenicol resistance (CamR); kanamycin resistance (KanR) | PP442601 |
| <b>pBWH-E4delE3-Ins4-Kan</b>           | 39646 bp | Genomic BACmid; carrying HAdV-E4 genome, E3-region deleted; Insertion Site 4 primed for HFR via insertion of KanR; ITRs flanked by ACT sequences; chloramphenicol resistance (CamR); kanamycin resistance (KanR)                                          | PP442607 |
| <b>pBWH-E4delE3-I4-mCMV-GFPt2aGLuc</b> | 40938 bp | Genomic BACmid; carrying HAdV-E4 genome, E3-region deleted; constitutive expression of T2A-peptide-linked GFP and gaussia luciferase from Insertion site 4; ITRs flanked by ACT sequences; chloramphenicol resistance (CamR); kanamycin resistance (KanR) | PP442602 |

**Table S1:** Bacmid assembly primers. Primers generating ITR overlaps used for genomic bacmid assembly. ITR homologous sequences are underlined.

| Virus    | Primer name | Sequence                                                                                                           |
|----------|-------------|--------------------------------------------------------------------------------------------------------------------|
| HAdV-A12 | BWHA12for   | <u>AGTCCAGTATAAGGTATATTATTAGATAGG</u> CCTCCGGGGTCCAC-<br>TGCAATTACTTCTCGACCAATTCTCATGTTTGAC                        |
|          | BWHA12rev   | <u>AGTCCAGTATAAGGTATATTATTAGATAGG</u> CCTCCGGGGTCCAC-<br>TGCAATTATAAACTCGACAGCGACACACTTGC                          |
| HAdV-B3  | BWHB03for   | <u>GTTGGCACCATTCCATCTATAAGGTATATTATATAGA-</u><br>TAGCCTCCGGGGTCCACTG-<br>CAATTACTTCTCGACCAATTCTCATGTTTGAC          |
|          | BWHB03rev   | <u>GTTGGCACCATTCCATCTATAAGGTATATTATATAGA-</u><br>TAGCCTCCGGGGTCCACTG-<br>CAATTATAAACTCGACAGCGACACACTTGC            |
| HAdV-B35 | BWHB35for   | <u>ATTGGCAC-</u><br><u>CATTCCATCTATAAGGTATATTATTGATGATGC</u> CCTCCGGGGTCCA<br>CTGCAATTACTTCTCGACCAATTCTCATGTTTGAC  |
|          | BWHB35rev   | <u>ATTGGCAC-</u><br><u>CATTCCATCTATAAGGTATATTATTGATGATGC</u> CCTCCGGGGTCCA<br>CTGCAATTATAAACTCGACAGCGACACACTTGC    |
| HAdV-C2  | BWHC02for   | <u>ATATTGGCTTCAATCCAAAA-</u><br><u>TAAGGTATATTATGATGATGC</u> CCTCCGGGGTCCACTG-<br>CAATTATAAACTCGACAGCGACACACTTGC   |
|          | BWHC02rev   | <u>ATATTGGCTTCAATCCAAAA-</u><br><u>TAAGGTATATTATGATGATGC</u> CCTCCGGGGTCCACTG-<br>CAATTACTTCTCGACCAATTCTCATGTTTGAC |
| HAdV-F41 | BWHF41for   | <u>TTCCAGCTTTAAGGTATATTATTGATGATGC</u> CCTCCGGGGTCCAC-<br>TGCAATTACTTCTCGACCAATTCTCATGTTTGAC                       |
|          | BWHF41rev   | <u>TTCCAGCTTTAAGGTATATTATTGATGATGC</u> CCTCCGGGGTCCAC-<br>TGCAATTATAAACTCGACAGCGACACACTTGC                         |
| SAdV-E25 | BWHSE25for  | <u>TAACGCGCACAAAAAGTTT-</u><br><u>GAGGTATATTATTGATGATGG</u> CCTCCGGGGTCCACTG-<br>CAATTACTTCTCGACCAATTCTCATGTTTGAC  |
|          | BWHSE25rev  | <u>TAACGCGCACAAAAAGTTTGAGGTATATTATTGAA-</u><br>GATGGCCTCCGGGGTCCACTG-<br>CAATTATAAACTCGACAGCGACACACTTGC            |

**Table S3.** Primers used for cloning of recombinant virus bacmids & transfer vectors.

| Name             | Sequence                                                                           |
|------------------|------------------------------------------------------------------------------------|
| B3-Ins0_For      | AGTCATTTTCGCGGTTATGCCAGG                                                           |
| B3-Ins0_Rev      | ACCTCCTGTGGCAGGAAGCG                                                               |
| B3-Ins0-Kan_For  | TTCTGAGTCATTTTCGCGGTTATGCCAGGGTGGAGTATTTAAATCCGTGTGGGCG-<br>GACAATAAAGTCTTAAACTGAA |
| B3-Ins0-Kan_Rev  | AGATAACCTCCTGTGGCAGGAAGCGCAGGTGTCTCATTTAAATAAATGTGGGCG-<br>GACAAAATAGTTGG          |
| B3-Ins0n-Kan_for | AACTGTTGAATGGTAGATTTATGTTTTTCTTGCGATTTAAATTCGTGTGGGCG-<br>GACAATAAAGTCTTAAACTGAA   |
| B3-Ins0n-Kan_rev | AAACGTATCCCTTGCTGAAGTGAGTTTGGCGGATCCATTTAAATAAATGTGGGCG-<br>GACAAAATAGTTGG         |
| B3-Ins1_For      | GAGTGGAAGCGCTTCTTTTG                                                               |
| B3-Ins1_Rev      | CATGCACTCCGACCTTGCTA                                                               |
| B3-Ins1-Kan_For  | GCCATGAGTGGAAGCGCTTCTTTTGAGGGGGGAGTATTTAAATCCGTGTGGGCG-<br>GACAATAAAGTCTTAAACTGAA  |
| B3-Ins1-Kan_Rev  | AACACCATGCACTCCGACCTTGCTATGACTGGGTGATTTAAATAAATGTGGGCG-<br>GACAAAATAGTTGG          |
| B3-Ins2_for      | ACTCTTAAAGAGTAGCCCTTGCCC                                                           |
| B3-Ins2_rev      | TGTGAACCCGTCAGGGGAAATGAA                                                           |
| B3-Ins2-Kan_For  | CGCTGACTCTTAAAGAGTAGCCCTTGCCCGCGCTCATTTAAATACGTGTGGGCG-<br>GACAATAAAGTCTTAAACTGAA  |
| B3-Ins2-Kan_Rev  | CTTTGTGTGAACCCGTCAGGGGAAATGAAACCAGGATTTAAATAAATGTGGGCG-<br>GACAAAATAGTTGG          |
| B3-Ins3_For      | AACTACTCAGGCAACCCTCA                                                               |
| B3-Ins3_rev      | TGAAAGCGCTTTAAAAGACTAT                                                             |
| B3-Ins3-Kan_For  | CCAGAACTACTCAGGCAACCCTCATAACCTCCCCATTTAAATCCGTGTGGGCG-<br>GACAATAAAGTCTTAAACTGAA   |
| B3-Ins3-Kan_Rev  | GACTGTGAAAGCGCTTTAAAAGACTATCCCGATGCATTTAAATAAATGTGGGCG-<br>GACAAAATAGTTGG          |
| B3-Ins4_For      | AAAAGGCACAGGAGAATAAAAAAT                                                           |
| B3-Ins4_Rev      | ATGGAATGGTGCCAACATGT                                                               |
| B3-Ins4-Kan_For  | AAAGTAAAAGGCACAGGAGAATAAAAAATATAATTATTTAAATCCGTGTGGGCG-<br>GACAATAAAGTCTTAAACTGAA  |
| B3-Ins4-Kan_Rev  | TATAGATGGAATGGTGCCAACATGTAAATGAGGTAATTTAAATAAATGTGGGCG-<br>GACAAAATAGTTGG          |
| E4-Ins0_For      | AGTAATTTAGTGTTTATGACAGGGAG                                                         |
| E4-Ins0_Rev      | CTCATCGGGCAGGTCTCTTA                                                               |
| E4-Ins0-Kan_For  | ATCTGAGTAATTTAGTGTTTATGACAGGGAGGAGTATTTAAATTCGTGTGGGCG-<br>GACAATAAAGTCTTAAACTGAA  |
| E4-Ins0-Kan_Rev  | ATTTCTCATCGGGCAGGTCTCTTAGGTGCCTCATATTTAAATAAATGTGGGCG-<br>GACAAAATAGTTGG           |
| E4-Ins0n-Kan_For | AGGCAAAGAGTAGGGTGACTGGGTGATGACTGGTTTATTTAAATTCGTGTGGGCG-<br>GACAATAAAGTCTTAAACTGAA |
| E4-Ins0n-Kan_Rev | GCTGGTAATCCCTGCTGAAATGGGTTTCTTGACTCCATTTAAATAAATGTGGGCG-<br>GACAAAATAGTTGG         |
| E4-Ins1_For      | TGGATGTGACGGAGGACCTG                                                               |
| E4-Ins1_Rev      | CACGCCCTGCGTCCCTGCTA                                                               |
| E4-Ins1-Kan_For  | GTGTGTGGATGTGACGGAGGACCTGCGACCCGATCATTTAAATGCGTGTGGGCG-<br>GACAATAAAGTCTTAAACTGAA  |

|                   |                                                                                     |
|-------------------|-------------------------------------------------------------------------------------|
| E4-Ins1-Kan_Rev   | AACACCACGCCCTGCGTCCCTGCTATGACTGGGTGATTAAATAAATGTGGGCG-<br>GACAAAATAGTTGG            |
| E4-Ins2_For       | TAAAGATTAAAGAGACGATGATTTTGAATTGATCAATAAA                                            |
| E4-Ins2_Rev       | CCTCCCCCAGCTTGAGGGTA                                                                |
| E4-Ins2-Kan_For   | ATCCAGTAAAAAAAATAAAGATTAAAGAGACGATGATTAAATGCGTGTGGGCG-<br>GACAATAAAGTCTTAAACTGAA    |
| E4-Ins2-Kan_Rev   | CGTCAAGGTCCACCCCTCCCCAGCTTGAGGGTAATTTAAATAAATGTGGGCG-<br>GACAAAATAGTTGG             |
| E4-Ins3_for       | TGATGACACCACCAGTGCATACTC                                                            |
| E4-Ins3_rev       | GGCAGTGTGTTCTGGAGGGG                                                                |
| E4-Ins3-Kan_For   | GGTACTGATGACACCACCAGTGCATACTCAATGTCATTTAAATCCGTGTGGGCG-<br>GACAATAAAGTCTTAAACTGAA   |
| E4-Ins3-Kan_Rev   | ACATGGGCAGTGTGTTCTGGAGGGGACGCCACCTGATTTAAATAAATGTGGGCG-<br>GACAAAATAGTTGG           |
| E4-Ins4_For       | TGCACTTCCTCAAACGCCCA                                                                |
| E4-Ins4_Rev       | TGTGAGTTAATATGCAAATAAGGCG                                                           |
| E4-Ins4-Kan_For   | ATACGTGCACTTCCTCAAACGCCCAAACCTGGCGTCATTTAAATTCGTGTGGGCG-<br>GACAATAAAGTCTTAAACTGAA  |
| E4-Ins4-Kan_Rev   | TTTTGTGTGAGTTAATATGCAAATAAGGCGTGAAAATTTAAATAAATGTGGGCG-<br>GACAAAATAGTTGGGAACTGGGAG |
| H3_B3-I0n_P1rev   | GGGTACCGAGCTCGAATTCCTGCGCCGTCGAACACTCAG-<br>CAGCTGACATAATTTTATTACATGAC              |
| H3_B3-I0n_P2rev   | CTTGCTGAAGTGAGTTTGGCGGATC                                                           |
| H3_E4-I0n_P1rev   | GGGTACCGAGCTCGAATTCCTGCGCCGTCGACCACGCAC-<br>TTAAAGTCAACACATATTTTATTGCA              |
| H3_E4-I0n_P2rev   | CCTGCTGAAATGGGTTTCTTGACTCCAT                                                        |
| H5_B3-I0n_P1for   | TGGTAGATTTATGTTTTTTTCTTGCGATTTTTTTGTAGGTC                                           |
| H5_B3-I0n-P2for   | GGGGATCCTCTAGAGTCGACCTGCAGGCATTTATTACTTCTTGGGTGGGGACTT-<br>GGATATATAA               |
| H5_E4-I0n_P1for   | TAGGGTGACTGGGTGATGACTGGTTTATT                                                       |
| H5_E4-I0n_P2for   | GGGGATCCTCTAGAGTCGACCTGCAGGCATTTATGACTCAGGGGAGGGGACTTTG                             |
| Ins_CMV-GLuc_Rev  | ATGCCTGCAGGTCGACTCTAGAGGATCCCCGAGTCGACAAGCTTGAATTCTG                                |
| Ins_mCMV-E4-1_for | GAGCTCGGTACCCGGGGATCCTCTAGAGTCGTAAGTCAATTAGGGACTTTCCAA                              |
| Ins_mCMV-E4-1_rev | GATTACGCCAAGCTTGCATGCCTGCAGGTCGAGTCGACAAGCTTGAATTCTG                                |
| Ins_mCMV-for      | CGACGGCCAGTGAATTTCGAGCTCGGTACCCGTAAGTCAATTAGGGACTTTCCAA                             |
| PUC-AV_For        | AATTCTAGAGCTCGTCAGGTGGCAC                                                           |
| PUC-AV_Rev        | TGCATCGCAGGAAAGAACATGTGAGC                                                          |

**Table S4.** Overview of synthetic DNA used to construct sub-cloning vectors for application in this study.

| Insert name | Sequence                                                                                                                                                                                                                                                                                                                                                                                                                                                                                                                                                                                                                                                                                                                                                                                                                                                                                                                                                                                                                                                                                                                                                                                                                                                                                                                                                                                                       |
|-------------|----------------------------------------------------------------------------------------------------------------------------------------------------------------------------------------------------------------------------------------------------------------------------------------------------------------------------------------------------------------------------------------------------------------------------------------------------------------------------------------------------------------------------------------------------------------------------------------------------------------------------------------------------------------------------------------------------------------------------------------------------------------------------------------------------------------------------------------------------------------------------------------------------------------------------------------------------------------------------------------------------------------------------------------------------------------------------------------------------------------------------------------------------------------------------------------------------------------------------------------------------------------------------------------------------------------------------------------------------------------------------------------------------------------|
| B3-Ins1     | TTTTGCTCACATGTTCTTTCCTGCGATGCAGAGTGGAAGCGCTTCTTTTGAGGGGGGAG-<br>TATTTAGCCCTTATCTGACGGGCAGGCTCCCACCATGGGCAGGAGTTCGTCAGAATGTCATGGGA<br>TCCACTGTGGATGGGAGACCCGTCCAGCCCGCCAATTCTCAACGCTGACCTATGCCACTTT-<br>GAGTTCGTCACCATTGGATGCAGCTGCAGCCGCCGCCGCTACTGCTGCCGCCAACACCATCCTTG<br>GAATGGGCTATTATGGAAGCATCGTTGCCAATTCCAGTTCCTCTAA-<br>TAACCCTTCAACCTGGCTGAGGACAAGCTACTTGTCTCTTGGCGCAGCTCGAGGCCTTAACCC<br>AACGCTTAGGCGAACTGTCTAAGCAGGTGGCCAGTTGCGTGAGCAAACCTGAGTCTGCTGTT-<br>GCCACAGCAAAGTCTAAATAAAGATCTCAAATCAATAAATAAAGAAATACTTGTAACGACG<br>GCCAGTGAATTCGAGCTCGGTACCCGGGGATCCTCTAGAGTCGACCTGCAGGCATGCAA-<br>GCTTGGCGTAATCATGGTCATAGCTGTTTCCTGGATATAAAACAAATGAATGTTTATTTGATTTT<br>CGCGCGCGGTATGCCCTGGACCATCGGTCTCGATCATTGAGAACGCGGTGGATCTTTTCCAG-<br>TACCCTGTAAAGGTGGGATTGAATGTTTAGATACATGGGCATTAGTCCGTCTCGGGGGTGGAGAT<br>AGCTCCATTGAAGAGCCTCTTGCTCCGGGGTAGTGTTATAAATCACCCAG-<br>TCATAGCAAGGTCGGAGTGCATGAATTCTAGAGCTCGTCAGGTGGCACTTTTC                                                                                                                                                                                                                                                                                                                                                                                                                                                                                |
| B3-Ins2     | TTTTGCTCACATGTTCTTTCCTGCGATGCAACTCTTAAAGAGTAGCCCTT-<br>GCCCCGCGCTCATTTTGAAAACGGCGGGAATCACGTCACCCCTGGCACCTGTCCTTTGCCCTTGTC<br>ATGAGTAAAGAGATTCCCACGCCTTACATGTGGAGCTATCAGCCCCAAATGGGGTTGGCAG-<br>CAGGCGCTTCCCAGGACTACTCCACCCGCATGAATTGGCTTAGCGCCGGGCCCTCAATGATATC<br>ACGGGTTAATGATATACGAGCTTATCGAAACCAGTTACTCCTAGAACAGTCAGCTCTCAC-<br>CACCACACCCCGTCAACACCTTAATCCCCGAAATTGGCCCCGCCACCCTGGTGTACCAGGAAAAT<br>CCCCTCCCACCACCGTACTACTTCCTCGAGACGCCCAGGCCGAAGTTCAGATGACTAAC-<br>GCAGGTGTACAGCTGGCGGGCGGTTCCGCCCTATGTCGTCACCGACCTCAACAGAGTATAAAAC<br>GCCTGGTGATTAGAGGCCGAGGTATCCAGCTCAACGACGAGTCGGTTAGCTCTTCGCTT-<br>GGTCTGCGACCAGACGGAGTCTTCCAAATCGCCGGCTGTGGGAGATCTTCCTTCACTCCTCGTCA<br>GGCTGTGCTGACTTTGGAGAGTTCGTCTCGCAGCCCCGCTCGGGCGGCATT-<br>GGAAGTCTCCAGTTTGTGGAGGAGTTTACTCCCTCTGTCTACTTCAACCCCTTCTCCGGCTCTCCT<br>GGCCAGTACCCGGACGAGTTCATACCAAACCTTCGACGCAATCAGCGAGTCAGTGGATGGC-<br>TATGATTGACGCGTCATTGCCCTACCTTACCCAATCAAAATATTAATAAAGACACTGTAAACG<br>ACGGCCAGTGAATTCGAGCTCGGTACCCGGGGATCCTCTAGAGTCGACCTGCAGGCATGCAA-<br>GCTTGGCGTAATCATGGTCATAGCTGTTTCCTGTACTTGAAATCAGCAATACAGTCTTTGTCAA<br>ACTTTCTACCAGCAGCACCTCACCTCTTCCCAACTCTGGTACTCTAAACGTCGGAGGGTGG-<br>CATACTTTCTCCACACTTTGAAAGGGATGTCAAATTTTATTTCTCTTCTTTGCCCACAATCTTCAT<br>TTCTTTATCCCCAGATGGCCAAGCGAGCTCGGCTAAGCACTTCCTTCAACCCGGTG-<br>TACCCTTATGAAGATGAAAGCAGCTCACAACACCCATTTATAAATCCTGGTTTCATTTCCCCTGA<br>CGGGTTCACAAATTCTAGAGCTCGTCAGGTGGCACTTTTC |
| B3-Ins3     | TTTTGCTCACATGTTCTTTCCTGCGATGCAAACTACTCAGGCAACCCTCATAAC-<br>CTCCCCATTTACCTTTTCCTATATTAGAGAAGATGACTGACAACAAAATAAAGTTCAGTAAAC<br>GACGGCCAGTGAATTCGAGCTCGGTACCCGGGGATCCTCTAGAGTCGACCTG-<br>CAGGCATGCAAGCTTGGCGTAATCATGGTCATAGCTGTTTCCTGACATTTTTTTATTGAAATTCCTT<br>TTACAGTATTCGAGTAGTTATTTTGCCTCCCCCTTCCCATTTAACAGAATACAC-<br>CAATCTCTCCCCACGCACAGCTTTAAACATTTGGATACCATTAGAGATAGACATAGTTTATAGATT<br>CCACATTCCAAACAGTTTCAGAGCGAGCCAATCTGGGGTCAG-<br>TAATACATAAAAATGCATCGGGATAGTCTTTTAAAGCGCTTTCAAATTCTAGAGCTCGTCAGGTG<br>GCACTTTTC                                                                                                                                                                                                                                                                                                                                                                                                                                                                                                                                                                                                                                                                                                                                                                                                                                                                                   |



**B3-Ins4**

TTTTGCTCACATGTTCTTTCTGCGATGCAAAAAGGCACAGGAGAATAAAAAA-  
TATAATTATTTCTCTGCTGCTGTTTCAGGCAACGTTGCTCCCGGTCCCTCTAAATAGACATACAAAG  
CCTCATCAGCCATGGCTTACCAGGCAAAGTACAGCGGGCGCACAAAGCACAAGCTCTAAA-  
GAAGCTCTAAAAACACTCTCCAACCTCTCCACAATATATACACAAGCCCTAAACTGACGTAATG  
GGAGTAAAGTGAAAAAAAATACCGCCAAGCCCAACACACACCCCGAAACTGCGTCAGCAG-  
GAAAAAGTACAGTTTCACTTCCGCATTCCCAACAAGCGTAACTTCCTCTTTCTCATGGTACGTCA  
CATCCGATTAACTTGCCTAAAACGACGGCCAGTGAATTCGAGCTCGGTACCCGGG-  
GATCCTCTAGAGTCGACCTGCAGGCATGCAAGCTTGGCGTAATCATGGTCATAGCTGTTTCCTGA  
ACGTCATTTTTCCACGGTTCGCGCCGCCCTTTAGCCGTTAACCCCGCAGCCAATCAC-  
CACACAGCGCGCACTTTTTTAAATTACCTCATTTACATGTTGGCACCATTCCATAATTCTAGAGCT  
CGTCAGGTGGCACTTTTC

**E4-Ins1**

TTTTGCTCACATGTTCTTTCTGCGATGCATGGATGTGACGGAGGAC-  
CTGCGACCCGATCATTGGTGTTGTCTGCACCGGGACGGAGTTCGGCTCCAGTGGGGAAGAATC  
TGACTAGAGTGAGTAGTGTTTTGGGGAGGGAGAGGACCTGCATAAGGGGCAGAATGAT-  
TAAAATCTGTGCTTTTCTGTGTGTTGCAGCAGCATGAGCGGAAACGGCTCCTTTGAGGGAGGGGT  
ATTCAGCCCTTATCTGACGGGGCGTCTCCCCTCCTGGGCGGGAGTTCGTCAAAAATGTGATGG-  
GATCCACGGTGGACGGCCGGCCCGTACAGCCCGCGAACTCTTCAACCCTGACCTATGCAACCCT  
GAGCTCCTCGTCGGTGGACGCAGCTGCCGCCG-  
CAGCTGCTGCTTCTGCCGCCAGCGCCGTGCGCGGAATGGCCATGGGCGCCGGCTATTACGGCAC  
TCTGGTGGCCAACCTCGAGTTCCTACTAATAATCCCGCCAGCCTGAACGAGGAGAA-  
GCTGCTGCTGTTGATGGCCAGCTCGAGGCCTTGACCCAGCGCCTGGGCGAGCTGACCCAGCAG  
GTGGCTCAGCTGCAGGAGCAGACGCGGGCCGCGGTTGCCACGGTGAAATCCAAA-  
TAAAAAATGAATCAATAAATAACGGAGACGGGTAAAACGACGGCCAGTGAATTCGAGCTCGG  
TACCCGGGGATCCTCTAGAGTCGACCTGCAGGCATGCAAGCTTGGCG-  
TAATCATGGTCATAGCTGTTTCCTGTTGTTGATTTTAAAAATCAGAGTCTGAATCTTTATTTGATT  
TTCGCGCACGGTAGGCCCTGGACCACCGGCCTCGATCATTGAGCACCCGGTG-  
GATCTTTTCCAAGACCCGGTAGAGGTGGGATTGGATATTGAGGTACATGGGCATGAGCCCGTCC  
CGGGGGTGAAGGTAGCTCCATTGCAGGGCCTCGTGCTCGGGGGTGGTGTT-  
GTAAATCACCCAGTCATAGCAGGGACGCAGGGCGTGAATTCTAGAGCTCGTCAGGTGGCACTTT  
TC

**E4-Ins2**

TTTTGCTCACATGTTCTTTCTGCGATGCAAAAAATAAAGATTAAAGAGACGATGATTTT-  
GAATTGATCAATAAAGAATGTAAAACGACGGCCAGTGAATTCGAGCTCGGTACCCGGGGATCCT  
CTAGAGTCGACCTGCAGGCATGCAAGCTTGGCGTAATCATGGTCATAGCTGTTTCCTGCAC-  
TTACTTGAAATCTGAAACCAGGTCTCTGTCCATGTTTTCTGTCAGCAGCACTTCGCTCCCCTCTTC  
CCAGCTCTGGTACTGCAGGCCCCGGCGGGCTGCAAACCTTCCTCCACACTCTGAAGGG-  
GATGTCAAATTCTCCTGTCCCTCAATCTTCATTTTTTATTTCTATTAGATGTCCAAAAAGCGCGC  
GCGGGTGGATGATGGCTTCGACCCCGTGTATCCCTACGATGCAGACAACGCACCGAC-  
CGTGCCCTTCATCAACCCTCCCTTCGTCTCTTCAGATGGATTCCAAGAAAAGCCCTGGGGGTGT  
TGTCCCTTAGGCTGGCCGACCCTGTCACCACCAAGAATGGGGAAATTACCCTCAAGCTGGGG-  
GAGGGGGTGGACCTAATTCTAGAGCTCGTCAGGTGGCACTTTTC

|                |                                                                                                                                                                                                                                                                                                                                                                                                                                                                                                                                                                                                                                                                                                                                                                                                                                                                                                                                                                                                                                                                                                                  |
|----------------|------------------------------------------------------------------------------------------------------------------------------------------------------------------------------------------------------------------------------------------------------------------------------------------------------------------------------------------------------------------------------------------------------------------------------------------------------------------------------------------------------------------------------------------------------------------------------------------------------------------------------------------------------------------------------------------------------------------------------------------------------------------------------------------------------------------------------------------------------------------------------------------------------------------------------------------------------------------------------------------------------------------------------------------------------------------------------------------------------------------|
| <b>E4-Ins3</b> | TTTTGCTCACATGTTCTTTCCTGCGATGCATGATGACACCACCAGTGCAT-<br>ACTCAATGTCAATTTTCATACACCTGGACTAACGGAAGCTATATCGGAGCAACATTTGGAGCTAAC<br>TCATACACCTTCTCCTACATAGCCCAACAATAATCCCACCCTGCATGCCAACCCAC-<br>CTTTTCCCTCTATTTATAAATGGAACTGAAACAAAAATAAAGTTCGTAAAACGACGGCCAGTG<br>AATTTCGAGCTCGGTACCCGGGGATCCTCTAGAGTCGACCTGCAGGCATGCAAGCTTGGCG-<br>TAATCATGGTCATAGCTGTTTCCTGAAGTGTTTTATTGATTCAACAGTTTTTCACAGGATTTCGAGT<br>AGTTATTTTCCCTCCACCCTCCCATCTCATGGAATACACTATCCTCTCCCCAC-<br>GCACAGCCTTAAACATCTGAATGCTATTGGTAATGGACATGGTTTTGATCTCCACATTCCACACA<br>GTTTCAGAGCGAGACAGTCTCGGGTTCGGTCAAGGAGATGAAACCCTCCGGGCACTCCTG-<br>CATCTGCACCTCACAGTTCAACAGCTGAGGGCTGTCCTCGGTGATTGGAATCACAGTTATCTGGA<br>ATAAGAGCGATGAGAATCATAATCCGCAAACGGGATCGGGCGGTTGTGGCG-<br>CATCAGGCCCCGCAGCAGTCGCTGTCTGCGCCGCTCCGTCAAGCTGCTACTCAAGGGGTCCGGG<br>TCCAGGGACTCCCTGCGCATGATGCCAATGGCCCTGAGCATCAGTCGCTGGTAC-<br>GGCGGGCGCAGCAGCGGATGCGGATCTCACTCAGGTCGGAGCAGTACGTGCAGCACAGCACCA<br>CCAAGTTGTTCAACAGTCCATAGTTCAACGTGCTCCAGCCAAAACCTCATTTGTGGAAC-<br>TATGCTGCCCACATGTCCATCGTACCAGATCCTGATGTAAATCAGGTGGCGTCCCCCTCCAGAACA<br>CACTGCCAATTCTAGAGCTCGTCAGGTGGCACTTTTC |
|                | TTTTGCTCACATGTTCTTTCCTGCGATGCATGCACTTCTCCTCAAAC-<br>GCCCAAACCTGGCGTCATTTCCGGTTTCCCACGCTACGTACCTCTCAACGACTTTCAAATTCCGTC<br>GACCGTTAAACACATCAGTTAGTAAACGACGGCCAGTGAATTCGAGCTCGGTACCCGGG-<br>GATCCTCTAGAGTCGACCTGCAGGCATGCAAGCTTGGCGTAATCATGGTCATAGCTGTTTCCTGC<br>CCCGCCCCTAACGAACGCCGCTGTCACAGCCAATCAGCGCGCCCCATCCCCAAATTTTCAC-<br>GCCTTATTTGCATATTAACACAAATTCTAGAGCTCGTCAGGTGGCACTTTTC                                                                                                                                                                                                                                                                                                                                                                                                                                                                                                                                                                                                                                                                                                                            |
| <b>E4-Ins4</b> |                                                                                                                                                                                                                                                                                                                                                                                                                                                                                                                                                                                                                                                                                                                                                                                                                                                                                                                                                                                                                                                                                                                  |

**Table S5.** Genomic insertion sites, demonstrated by 30 nt sequences directly adjacent to transgene insertion.

| 5' homologous region           | Site          | 3' homologous region            |
|--------------------------------|---------------|---------------------------------|
| GTAATAAAATTATGTCAGCTGCTGAGTGTT | <b>B3-I0n</b> | TTATTACTTCTTGGGTGGGCACTTGGATAT  |
| GACTTTGACCGTTTACGTGGAGGTTTCGAT | <b>B3-I0</b>  | TACCGTGTTTTTCACCTAAATTTCCGCGTA  |
| GATCTCAAATCAATAAATAAAGAAATACTT | <b>B3-I1</b>  | GATATAAAACAAATGAATGTTTATTTGATT  |
| TTACCCAATCAAAATATTAATAAAGACACT | <b>B3-I2</b>  | TACTTGAAATCAGCAATACAGTCTTTGTCA  |
| GAAGATGACTGACAACAAAAATAAAGTTCA | <b>B3-I3</b>  | ACATTTTTTTATTGAAATTCCTTTTACAGTA |
| CTCATGGTACGTCACATCCGATTAACCTGC | <b>B3-I4</b>  | AACGTCATTTTCCCACGGTCGCGCCGCCCC  |
| TAAAATATGTGTTGACTTTAAGTGCGTGGT | <b>E4-I0n</b> | TTATGACTCAGGGGAGGGGACTTTGGGTAT  |
| GACTTTGACCGTTTACGTGGGGGTTTCGAT | <b>E4-I0</b>  | TACCGTGTTTTTCACCTAAAGTTCCGCGTA  |
| AAAAATGAATCAATAAATAAACGGAGACGG | <b>E4-I1</b>  | TTGTTGATTTTAAAAATCAGAGTCTGAATC  |
| ACGATGATTTTGAATTGATCAATAAAGAAT | <b>E4-I2</b>  | CACTTACTTGAAATCTGAAACCAGGTCTCT  |
| TAAATGGAAACTGAAACAAAAATAAAGTTC | <b>E4-I3</b>  | AAGTGTTTTATTGATTCAACAGTTTTTCAC  |
| AATTCCGTGCACCGTTAAACACATCAGTTA | <b>E4-I4</b>  | CCCCGCCCTAACGAACGCCGCTGTCACAG   |

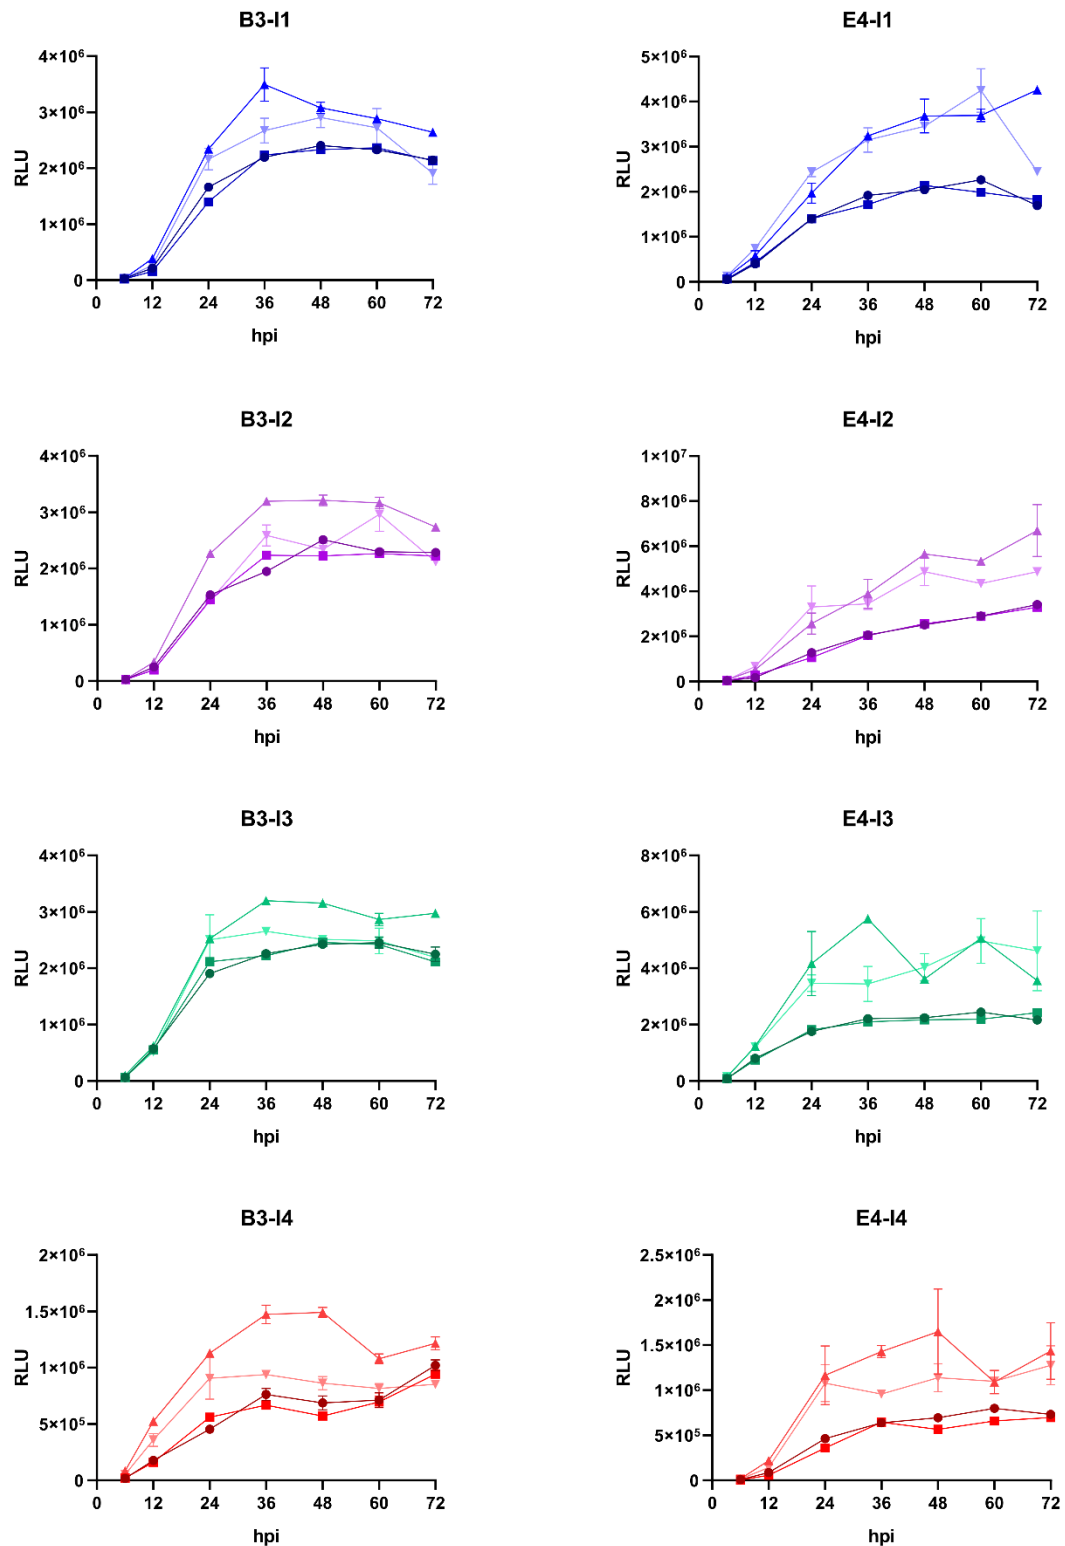

**Figure S1.** Expression profiles of insertion sites. Expression of transgene over time as determined by Luciferase assay for HAdV-B3 and HAdV-E4 based vectors. Colour and connecting lines indicate single experiments.
